# PB1

Tree scale: 0.01

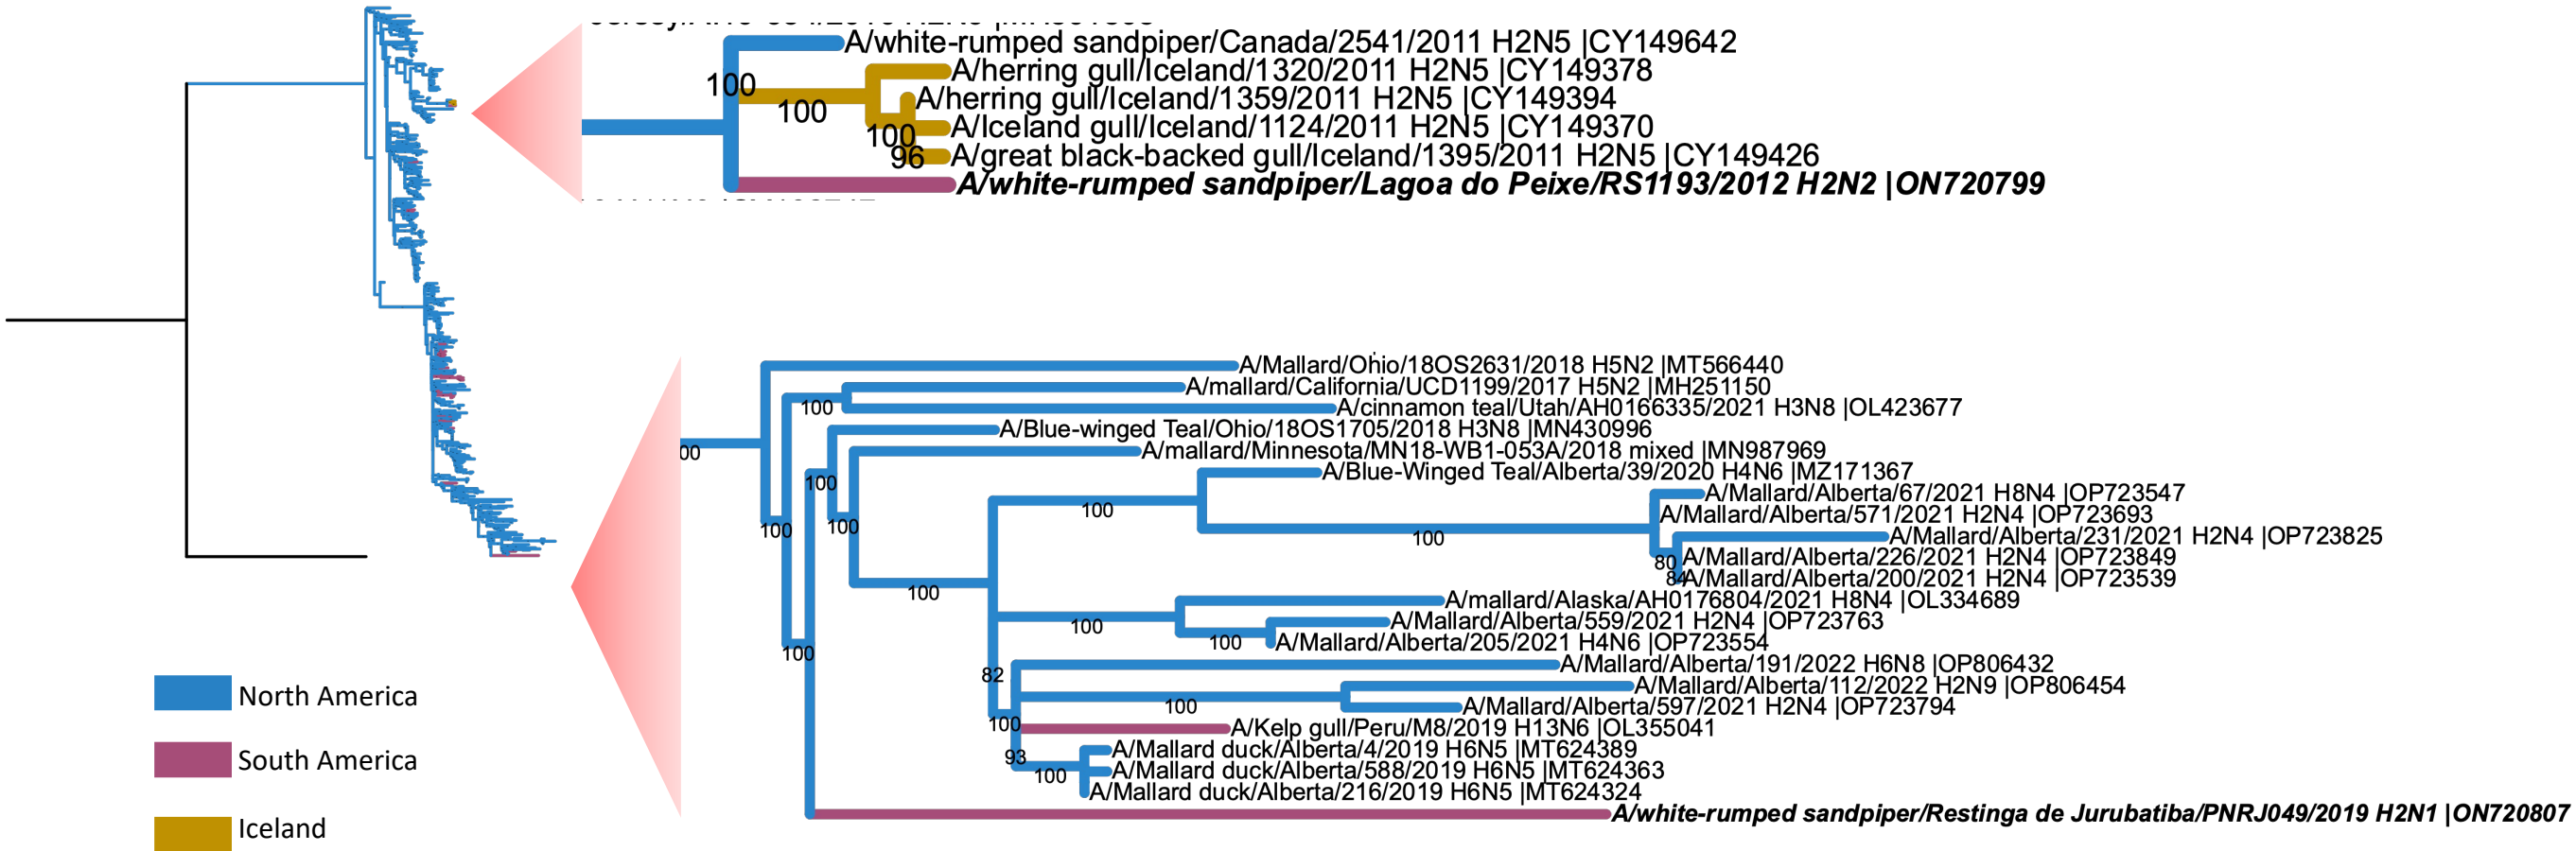

Source: https://storage.googleapis.com/plos-corpus-prod/10.1371/journal.pone.0300862/1/pone.0300862.s002.pdf
